# Supplementary material for: Microfluidic LC device with orthogonal sample extraction for on-chip MALDI-MS detection
Source: Royal Society of Chemistry journal article supplement (doi:10.1039/c3lc50190f), 2013-03-20
Supplement: c3lc50190f.xlsx [file c3lc50190f.xlsx]

## Sheet: Sheet1
Supplemental Table 1. List of singly charged peptides (MH+) with very close m/z values that can be generated from the standard mixture of proteins.
BSA-bovine serum albumin; CASA-alpha casein; CASB-beta casein; CAH-carbonic anhydrase; CYC-cytochrome C; FETUA-alpha fetuin; HBA-hemoglobin alpha; HBB-hemoglobin beta; LALBA-lactalbumin.
MH(1+)	Protein	Position	Number of missed cleavages	Amino acid sequence
517.298	BSA	281-285	0	ADLAK
517.334	CASB	44-47	1	KIEK
545.286	FETUA	349-353	0	LCPGR
545.341	BSA	101-105	0	VASLR
649.334	BSA	205-209	0	IETMR
649.334	BSA	223-228	0	CASIQK
689.373	BSA	236-241	0	AWSVAR
689.383	CASA1	52-57	0	VNELSK
703.398	HBA	41313	0	VLSAADK
703.41	BSA	212-218	0	VLASSAR
745.334	FETUA	226-231	0	QYGFCK
745.445	LALBA	30-35	1	ELKDLK
748.37	CASA1	209-214	0	TTMPLW
748.37	CASB	123-128	0	EMPFPK
818.425	BSA	562-568	0	ATEEQLK
818.441	HBA	94-100	0	VDPVNFK
831.384	CASA1	99-105	0	EDVPSER
831.484	CAH2	254-260	1	QVRGFPK
987.537	BSA	29-36	1	SEIAHRFK
987.569	BSA	212-220	1	VLASSARQR
1002.51	CAH2	28-36	0	QSPVDIDTK
1002.58	BSA	598-607	0	LVVSTQTALA
1018.44	CYC	15-23	0	CAQCHTVEK
1018.5	CAH2	19-27	0	DFPIANGER
1101.55	HBB	19-29	0	VDEVGGEALGR
1101.63	HBA	41317	1	VLSAADKGNVK
1101.63	CAH2	252-260	2	NRQVRGFPK
1138.57	BSA	223-232	1	CASIQKFGER
1138.64	CASB	113-122	2	VKEAMAPKHK
1177.56	BSA	300-309	0	ECCDKPLLEK
1177.67	HBB	41504	1	AAVTAFWGKVK
1177.68	HBB	132-143	0	VVAGVANALAHR
1202.68	BSA	219-228	2	QRLRCASIQK
1202.7	CAH2	159-169	1	VLDALDSIKTK
1252.64	LALBA	20-29	1	EQLTKCEVFR
1252.7	FETUA	349-358	2	LCPGRIRYFK
1434.8	CYC	89-100	2	KGEREDLIAYLK
1434.8	CYC	90-101	2	GEREDLIAYLKK
1511.84	BSA	438-451	0	VPQVSTPTLVEVSR
1511.95	BSA	545-557	2	QIKKQTALVELLK
1566.91	CYC	74-87	2	KYIPGTKMIFAGIK
1566.91	CYC	75-88	2	YIPGTKMIFAGIKK
1633.02	BSA	548-561	2	KQTALVELLKHKPK
1633.66	BSA	184-197	0	YNGVFQECCQAEDK
1633.82	CYC	41570	1	IFVQKCAQCHTVEK
1692.92	FETUA	58-71	1	HTLNQIDSVKVWPR
1692.94	BSA	249-263	1	AEFVEVTKLVTDLTK
1752.03	BSA	360-374	2	RHPEYAVSVLLRLAK
1752.9	HBB	41290	1	MLTAEEKAAVTAFWGK
1850.9	BSA	529-544	0	LFTFHADICTLPDTEK
1850.92	BSA	452-468	2	SLGKVGTRCCTKPESER
1888.93	BSA	169-183	0	HPYFYAPELLYYANK
1888.99	BSA	89-105	1	SLHTLFGDELCKVASLR
1942.82	BSA	264-280	1	VHKECCHGDLLECADDR
1942.98	BSA	29-44	2	SEIAHRFKDLGEEHFK
2001.11	FETUA	334-353	1	TPIVGQPSIPGGPVRLCPGR
2001.99	CAH2	19-36	1	DFPIANGERQSPVDIDTK
2301.08	BSA	341-359	1	NYQEAKDAFLGSFLYEYSR
2301.24	LALBA	114-133	2	ILDKVGINYWLAHKALCSEK
2316.05	BSA	184-204	1	YNGVFQECCQAEDKGACLLP K
2316.14	CASA1	148-166	0	EPMIGVNQELAYFYPELFR
2321.08	CASA1	74-94	0	QMEAESISSSEEIVPNSVEQ K
2321.25	CASA1	99-117	2	EDVPSERYLGYLEQLLRLK
2441.1	BSA	264-285	2	VHKECCHGDLLECADDRADL AK
2441.17	BSA	524-544	1	AFDEKLFTFHADICTLPDTE K
2441.23	HBA	11933	2	GNVKAAWGKVGGHAAEYGAE ALER
2584.16	CAH2	90-111	0	LVQFHFHWGSSDDQGSEHTV DR
2584.42	HBB	17-39	2	VKVDEVGGEALGRLLVVYPW TQR
2852.35	FETUA	29-54	1	EPACDDPDTEQAALAAVDYI NKHLPR
2852.48	CAH2	227-251	0	TLNFNAEGEPELLMLANWRP AQPLK
3016.38	FETUA	132-159	2	CDSSPDSAEDVRKLCPDCPL LAPLNDSR
3016.57	FETUA	160-187	0	VVHAVEVALATFNAESNGSY LQLVEISR
3157.55	BSA	496-523	2	VTKCCTESLVNRRPCFSALT PDETYVPK
3157.62	CASB	16-43	2	RELEELNVPGEIVESLSSSE ESITRINK
3345.58	BSA	123-151	2	NECFLSHKDDSPDLPKLKPD PNTLCDEFK
3345.66	HBB	30-58	1	LLVVYPWTQRFFESFGDLST ADAVMNNPK
3758.9	BSA	402-433	2	HLVDEPQNLIKQNCDQFEKL GEYGFQNALIVR
3759.08	CASB	185-217	2	VLPVPQKAVPYPQRDMPIQA FLLYQEPVLGPVR
5459.63	FETUA	72-120	1	RPTGEVYDIEIDTLETTCHV LDPTPLANCSVRQQTQHAVE GDCDIHVLK
5459.86	FETUA	160-211	1	VVHAVEVALATFNAESNGSY LQLVEISRAQFVPLPVSVSV EFAVAATDCIAK
